# Supplementary material
Source: PubMed Central journal article supplement (PMC5156562)
Supplement: NIHMS1241-supplement-supplement_1.pdf [file NIHMS1241-supplement-supplement_1.pdf]

**Table DS1** Factors related to adherence to 3-month post-discharge appointments and medication

| Variables                                   | Appointments    |                     |                   |       | Medication      |                     |                  |       |
|---------------------------------------------|-----------------|---------------------|-------------------|-------|-----------------|---------------------|------------------|-------|
|                                             | Adherers (n=41) | Non-adherers (n=40) | OR (95% CI)       | P     | Adherers (n=29) | Non-adherers (n=39) | OR (95% CI)      | P     |
| Male, n (%)                                 | 19 (46.3)       | 25 (62.5)           | 0.52 (0.21–1.26)  | 0.146 | 11 (37.9)       | 24 (61.5)           | 0.38 (0.14–1.03) | 0.057 |
| Married, n (%)                              | 15 (36.6)       | 10 (25.0)           | 1.73 (0.67–4.51)  | 0.261 | 12 (41.4)       | 8 (20.5)            | 2.74 (0.94–7.99) | 0.066 |
| Education ≥ 10 years, n (%)                 | 26 (63.4)       | 26 (65.0)           | 0.93 (0.38–2.32)  | 0.882 | 18 (62.1)       | 28 (71.8)           | 0.64 (0.23–1.79) | 0.398 |
| Illness duration ≥ 1 year, n (%)            | 27 (65.9)       | 29 (72.5)           | 0.73 (0.28–1.89)  | 0.518 | 19 (65.5)       | 28 (71.8)           | 0.75 (0.27–2.10) | 0.580 |
| Distance of residence ≥ 20 km, n (%)        | 17 (41.5)       | 19 (47.5)           | 0.78 (0.33–1.88)  | 0.585 | 10 (34.5)       | 20 (51.3)           | 0.50 (0.19–1.35) | 0.170 |
| Previous treatment, n (%)                   | 27 (65.9)       | 31 (77.5)           | 0.56 (0.21–1.50)  | 0.248 | 19 (65.5)       | 28 (71.8)           | 0.75 (0.27–2.10) | 0.580 |
| Employed or in school, n (%)                | 21 (51.2)       | 22 (55.0)           | 0.86 (0.36–2.06)  | 0.733 | 15 (51.7)       | 23 (59.0)           | 0.75 (0.28–1.96) | 0.552 |
| Length of admission ≥ 8 weeks, n (%)        | 24 (58.5)       | 22 (55.0)           | 1.16 (0.48–2.78)  | 0.748 | 16 (55.2)       | 23 (59.0)           | 0.86 (0.32–2.26) | 0.754 |
| Medication side-effects at discharge, n (%) | 11 (26.8)       | 12 (30.0)           | 0.86 (0.33–2.25)  | 0.752 | 8 (27.6)        | 9 (23.1)            | 1.27 (0.42–3.83) | 0.671 |
| Diagnosis, n (%)                            |                 |                     |                   |       |                 |                     |                  |       |
| Affective disorder                          | 14 (34.1)       | 6 (15.0)            | Reference         |       | 11 (37.9)       | 9 (23.1)            | Reference        |       |
| Substance use                               | 2 (4.9)         | 11 (27.5)           | 0.08 (0.01–0.46)  | 0.005 | 1 (3.4)         | 9 (23.1)            | 0.09 (0.01–0.86) | 0.036 |
| Psychosis (non-affective)                   | 25 (61.0)       | 23 (57.5)           | 0.47 (0.15–1.42)  | 0.178 | 17(58.6)        | 21 (53.8)           | 0.66 (0.22–1.97) | 0.458 |
| Age, years: n (%)                           |                 |                     |                   |       |                 |                     |                  |       |
| 11–20                                       | 7 (17.1)        | 5 (12.5)            | Reference         |       | 5 (17.2)        | 5(12.8)             | Reference        |       |
| 21–30                                       | 17 (41.5)       | 15 (37.5)           | 0.81 (0.21–3.10)  | 0.757 | 11 (37.9)       | 19 (48.7)           | 0.58 (0.14–2.46) | 0.458 |
| 31–40                                       | 9 (22.0)        | 14 (35.0)           | 0.46 (0.11–1.90)  | 0.283 | 8 (27.6)        | 9 (23.1)            | 0.89 (0.19–4.24) | 0.883 |
| 41–50 <sup>a</sup>                          | 8 (19.5)        | 6 (15.0)            | 0.95 (0.20–4.54)  | 0.952 | 5 (17.2)        | 6 (15.4)            | 0.83 (0.15–4.64) | 0.835 |
| Family involved in therapy, n (%)           | 36 (87.8)       | 25 (62.5)           | 4.32 (1.39–13.42) | 0.011 | 25 (86.2)       | 30 (76.9)           | 1.88 (0.52–6.82) | 0.340 |
| BPRS score at discharge: mean (s.d.)        | 4.0 (2.6)       | 6.1 (4.0)           |                   | 0.012 | 4.1 (2.6)       | 4.9 (3.2)           |                  | 0.274 |

BPRS. Brief Psychiatric Rating Scale.  
a. Included one patient over the age of 50.
